# Supplementary material for: Activation of Jak2 in patients with blast crisis chronic myelogenous leukemia: inhibition of Jak2 inactivates Lyn kinase
Source: PubMed Central journal article supplement — Blood Cancer J. 2013 Sep 6;3(9):e142–. doi: 10.1038/bcj.2013.41 (PMC3789205; doi:10.1038/bcj.2013.41), 2013-09-06
Supplement: bcj201341x1.pdf [file bcj201341x1.pdf]

## Supplemental Information

### **Methods**

Patient samples. SDS sample buffer extracts from CML BC cells were supplied by biorespository maintained by the PO1 grant CA45369. Viable cells from patients with CML in BC were provided by the Biospecimen Repository maintained by the Department of Hematopathology. All human samples were supplied through the approved human protocol awarded to RBA.

Cell culture of BC CML blood cells. Fresh or viably frozen blood cells from BC CML patients were fractionated by Ficoll centrifugation and cultured for 16 h as described<sup>5</sup>.

Western Blotting. Samples were boiled in SDS sample buffer and processed as described<sup>6</sup>.

Knockdown of Jak2 in K562R cells. The inducible Jak2-specific shRNA was purchased from Open BioSystems and Jak2 knockdown was carried out as described<sup>4</sup>.
